# Supplementary material
Source: PubMed Central journal article supplement (PMC404088)

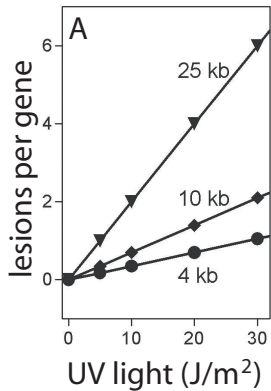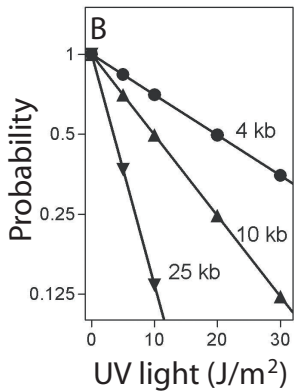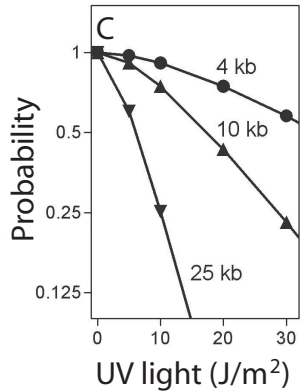

Supplement: pnas_101_17_6582__1.pdf [file pnas_101_17_6582__1.pdf]
